# Supplementary material
Source: Springer Nature journal article supplement (https://www.springermedizin.de/resource/supplementary/12885_2011_2971_MOESM2_ESM.pdf/9462352)

Control group

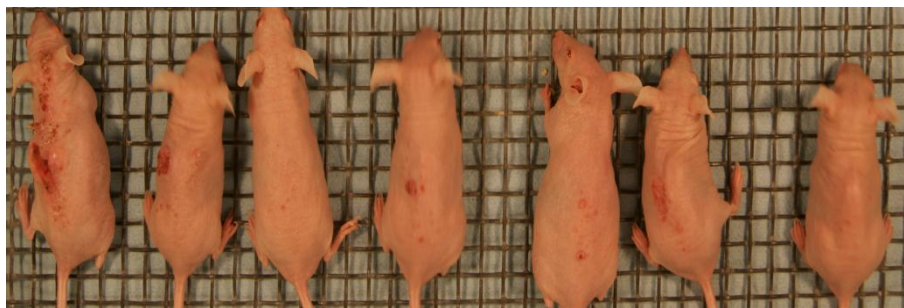

Magnolol 30  $\mu\text{g}$

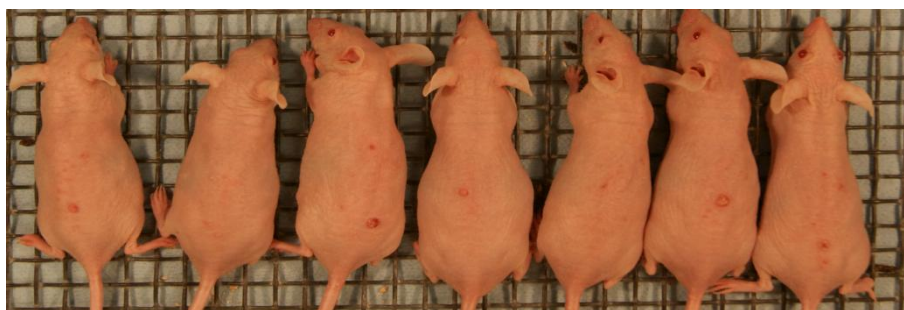

Magnolol 45  $\mu\text{g}$

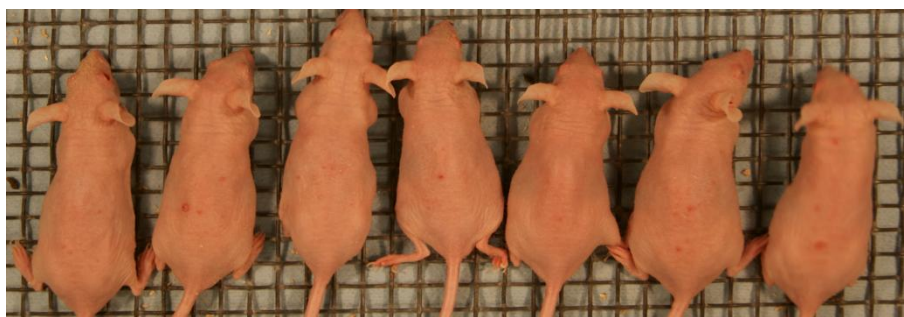

Magnolol 60  $\mu\text{g}$

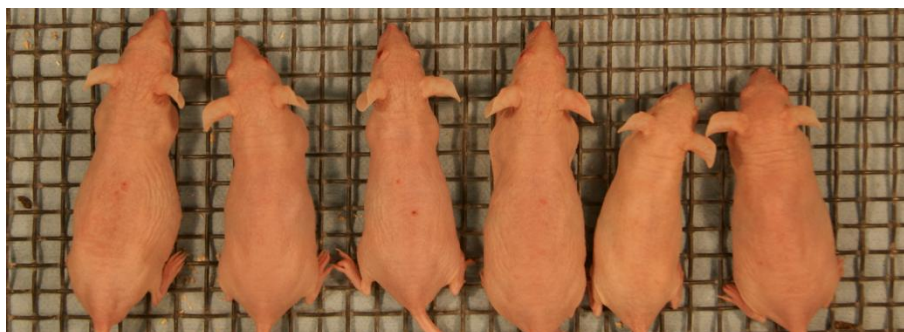

Supplement: MOESM2 [file 9462352]
